# Supplementary material
Source: publisher figshare collection journal article supplement (https://wiley.figshare.com/ndownloader/files/5617176)
Supplement: Supplementary file 1 [file 5617176]

Ecological Archives E091-219-A4


### *Ecological Archives* E091-219-A4

### Camille Melin, Cindy Huchery, M. Julian Caley, Mark G. Meekan, and Corey J. A. Bradshaw. 2010. Reef size and isolation determine the temporal stability of coral reef fish populations. *Ecology* 91:3138–3145.

Appendix D (TABLE D1). Summary of generalized linear model (GLM) comparisons using Akaike’s information criterion corrected for small sample sizes (AIC*c*). Response variables include reef area (AREA) and reef isolation (ISO). Predictors include longitude (lon) and latitude (lat). Shown are the number of parameters (*k*), model maximum log-likelihood (LL), change in AIC*c* (?AIC*c*), AIC*c* weight (*w*AIC*c*) and the percent deviance explained (D). D is a measure of the structural goodness-of-fit of the model. Model sequences are ordered by increasing AIC*c*.

|  |  |  |  |  |  |
| --- | --- | --- | --- | --- | --- |
| **model** | ***k*** | **LL** | **?****AIC*c*** | ***w*****AIC*c*** | **D** |
| AREA ~ lon + lat | 3 | -25916.80 | 0.00 | 0.73 | 6.79 |
| AREA ~ lon × lat | 4 | -25916.77 | 1.96 | 0.27 | 6.60 |
| AREA ~ lat | 2 | -25926.40 | 17.20 | 0.00 | 4.89 |
| AREA ~ lon | 2 | -25940.59 | 45.58 | 0.00 | 2.88 |
| AREA ~ 1 | 1 | -25958.65 | 79.70 | 0.00 | 0.00 |
| ISO ~ lon × lat | 4 | -10504.35 | 0.00 | > 0.99 | 34.44 |
| ISO ~ lon + lat | 3 | -10998.07 | 985.45 | < 0.01 | 23.48 |
| ISO ~ lon | 2 | -11802.54 | 2592.39 | < 0.01 | 1.57 |
| ISO ~ lat | 2 | -11846.50 | 2680.30 | < 0.01 | 0.20 |
| ISO ~ 1 | 1 | -11852.99 | 2691.28 | < 0.01 | 0.00 |

---


[Back to E091-219]
